# Supplementary material
Source: Springer Nature journal article supplement (https://www.springermedizin.de/resource/supplementary/12884_2012_704_MOESM3_ESM.pdf/9458464)

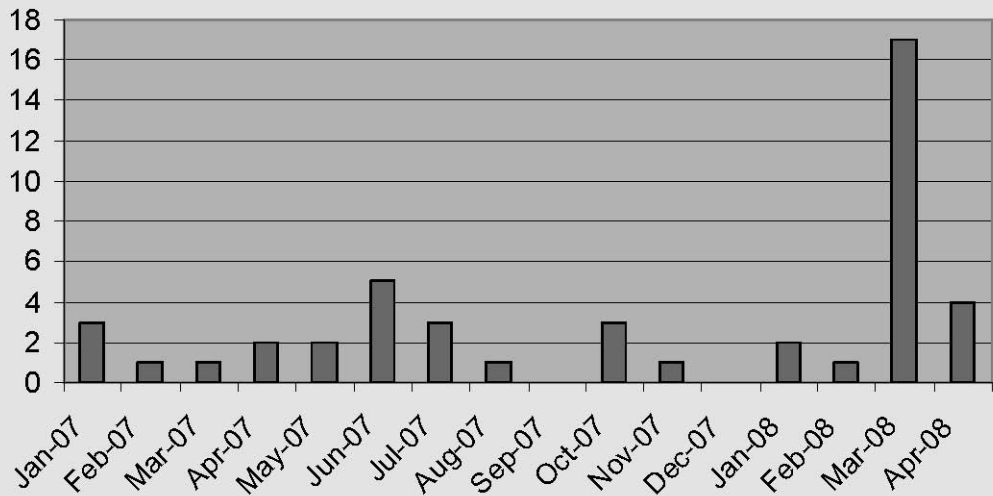

Supplement: MOESM3 [file 9458464]
